# Supplementary material for: Auxin regulation involved in gynoecium morphogenesis of papaya flowers
Source: PubMed Central journal article supplement (PMC6823548; doi:10.1038/s41438-019-0205-8), 2019-11-01
Supplement: 41438_2019_205_MOESM1_ESM.pdf [file 41438_2019_205_MOESM1_ESM.pdf]

Supplementary Tab. 1 Statistics summary of different flower samples

| Variety    | Sex                    | Sources           | Samples | Reads number | Uniquely mapped reads number | Uniquely mapped reads % |       |
|------------|------------------------|-------------------|---------|--------------|------------------------------|-------------------------|-------|
| Zhongbai   | Female flowers         |                   | F-FG-1  | 14818720     | 12479097                     | 84.2%                   |       |
|            |                        |                   | F-FG-2  | 18910565     | 16157509                     | 85.4%                   |       |
|            |                        |                   | F-FG-3  | 17757504     | 14946366                     | 84.2%                   |       |
|            | Hermaphroditic flowers | Dominant flowers  |         | H_dom-FG-1   | 18445542                     | 15288277                | 82.8% |
|            |                        |                   |         | H_dom-FG-2   | 19970646                     | 17241378                | 86.3% |
|            |                        |                   |         | H_dom-FG-3   | 20164217                     | 16385653                | 81.3% |
|            |                        |                   |         | H_dom-RG-1   | 17002622                     | 14606595                | 85.9% |
|            |                        |                   |         | H_dom-RG-2   | 21753451                     | 18950347                | 87.1% |
|            |                        |                   |         | H_dom-RG-3   | 12145477                     | 10014029                | 82.4% |
|            |                        | Auxiliary flowers |         | H_aux-RG-1   | 18699560                     | 16225050                | 86.8% |
|            |                        |                   |         | H_aux-RG-2   | 18412657                     | 15168292                | 82.4% |
|            |                        |                   |         | H_aux-RG-3   | 16272813                     | 14065551                | 86.4% |
| Zhonghuang | Female flowers         |                   | F.FG-1  | 15542782     | 13556652                     | 87.2%                   |       |
|            |                        |                   | F.FG-2  | 15941598     | 13890426                     | 87.1%                   |       |
|            |                        |                   | F.FG-3  | 17768971     | 15291339                     | 86.1%                   |       |
|            | Male flowers           |                   | M.RG-1  | 13157727     | 11310929                     | 86.0%                   |       |
|            |                        |                   | M.RG-2  | 15510777     | 12923914                     | 83.3%                   |       |
|            |                        |                   | M.RG-3  | 18367834     | 15880162                     | 86.5%                   |       |

Supplementary Tab. 2 FPKM of related signaling transduction molecule gene in the comparisons between functional and rudimentary gynoeceium samples

| Biological process                | Gene symbol       | Gene ID                     | FPKM     |          |          |          |          |          |
|-----------------------------------|-------------------|-----------------------------|----------|----------|----------|----------|----------|----------|
|                                   |                   |                             | F-FG     | H_dom-FG | H_dom-RG | H_aux-RG | F.FG     | M.RG     |
| Auxin signal transduction         | <i>CpAUX1</i>     | (evm.TU.supercontig_19.209) | 78.4505  | 64.0130  | 133.4070 | 126.8460 | 53.5650  | 87.5300  |
|                                   | <i>CpTIR1/AFB</i> | (evm.TU.supercontig_27.130) | 34.9850  | 30.6249  | 53.3262  | 52.6555  | 41.3501  | 66.5562  |
|                                   | <i>CpIAA26</i>    | (evm.TU.contig_35052.1)     | 145.1840 | 169.6370 | 57.2707  | 47.8887  | 249.7960 | 96.0987  |
|                                   | <i>CpIAA1</i>     | (evm.TU.supercontig_87.29)  | 66.6903  | 70.05450 | 31.8663  | 28.4595  | 69.0893  | 36.4540  |
|                                   | <i>CpARF4</i>     | (evm.TU.supercontig_139.80) | 59.1576  | 71.6908  | 267.4030 | 315.1410 | 105.6460 | 406.7520 |
|                                   | <i>CpSUAR</i>     | (evm.TU.supercontig_2619.1) | 80.2177  | 42.5502  | 198.4090 | 170.7930 | 56.5522  | 183.7190 |
|                                   | <i>CpGH3.9</i>    | (evm.TU.supercontig_9.204)  | 41.6617  | 58.2735  | 94.8120  | 105.5990 | 33.8957  | 142.8410 |
| Auxin conjugating formation       | <i>CpGH3.1</i>    | (evm.TU.supercontig_6.74)   | 18.3295  | 18.4227  | 1.5203   | 1.4177   | 10.4661  | 1.89726  |
|                                   | <i>CpGH3.6_1</i>  | (evm.TU.supercontig_1065.2) | 12.1548  | 16.6130  | 3.86713  | 2.8183   | 22.4035  | 6.48987  |
|                                   | <i>CpGH3.6_2</i>  | (evm.TU.contig_32826.1)     | 20.5534  | 28.1409  | 9.0444   | 6.7900   | 39.0433  | 13.6209  |
| Auxin polar transport             | <i>CpPIN1a</i>    | (evm.TU.contig_35483.1)     | 104.3550 | 107.0910 | 65.6750  | 52.3855  | 132.0590 | 68.6681  |
|                                   | <i>CpPIN1b</i>    | (evm.TU.contig_44255.1)     | 104.1900 | 107.8910 | 70.9593  | 63.4071  | 199.8260 | 87.7924  |
| Cytokinin signal transduction     | <i>CpAHP1_1</i>   | (evm.TU.supercontig_84.120) | 174.1290 | 136.2980 | 25.0568  | 36.9384  | 205.5860 | 14.3845  |
|                                   | <i>CpAHP1_2</i>   | (evm.TU.supercontig_16.84)  | 336.8710 | 305.8490 | 152.2580 | 118.7420 | 354.9870 | 151.4080 |
|                                   | <i>CpA-ARR</i>    | (evm.TU.supercontig_64.98)  | 14.8845  | 23.5326  | 5.3995   | 4.2360   | 12.1785  | 0.761709 |
| Gibberellin signal transduction   | <i>CpGID1_1</i>   | (evm.TU.supercontig_84.118) | 326.5290 | 295.0140 | 161.2040 | 151.4900 | 325.1100 | 178.5630 |
|                                   | <i>CpGID1_2</i>   | (evm.TU.supercontig_731.1)  | 201.5400 | 178.4570 | 92.8497  | 85.4265  | 211.2540 | 103.6090 |
|                                   | <i>CpGID2</i>     | (evm.TU.supercontig_21.140) | 257.3810 | 242.6050 | 131.8800 | 117.6840 | 350.7620 | 177.3180 |
|                                   | <i>CpDELLA</i>    | (evm.TU.supercontig_75.88)  | 28.3233  | 31.9491  | 82.6978  | 55.3735  | 20.0456  | 39.5802  |
| Abscisic acid signal transduction | <i>CpSnRK2_1</i>  | (evm.TU.supercontig_98.59)  | 56.4413  | 60.7926  | 24.9977  | 26.3229  | 106.5280 | 18.7974  |
|                                   | <i>CpSnRK2_2</i>  | (evm.TU.supercontig_62.55)  | 263.3710 | 313.0220 | 148.0030 | 117.0400 | 362.2200 | 233.6430 |
|                                   | <i>CpSnRK2_3</i>  | (evm.TU.supercontig_36.167) | 27.7257  | 27.8681  | 7.55427  | 5.9136   | 36.1018  | 11.9450  |
|                                   | <i>CpABF</i>      | (evm.TU.supercontig_5.28)   | 38.6877  | 45.3772  | 3.2103   | 1.8227   | 81.2703  | 3.0083   |
| Ethylene signal transduction      | <i>CpEIN3</i>     | (evm.TU.supercontig_54.30)  | 21.4569  | 17.9688  | 8.15673  | 8.0689   | 65.8606  | 14.2208  |

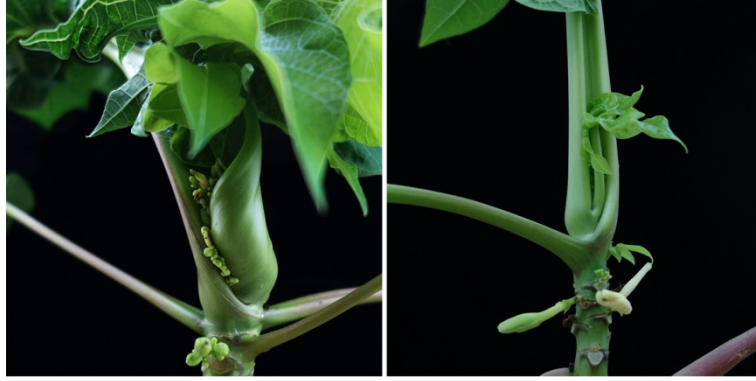

Supplementary Fig. 1 The side effect of long-term NPA treatment (male papaya)
